# Supplementary material
Source: MDPI journal article supplement (https://www.mdpi.com/2227-9717/11/3/871)
Supplement: s1 [file s1]

1 Supplementary material

2 **Table S1.** Information and 16-OMC content of single green coffee samples.

| <b>Sample number</b> | <b>Coffee origin</b> | <b>Variety<sup>a</sup></b> | <b>16-OMC (mg/kg)</b> | <b>SD</b> |
|----------------------|----------------------|----------------------------|-----------------------|-----------|
| SG1                  | Brazil               | Arabica                    | nd <sup>c</sup>       | -         |
| SG2                  | Ethiopia             | Arabica                    | nd                    | -         |
| SG3                  | Guatemala            | Arabica                    | nd                    | -         |
| SG4                  | Costa Rican          | Arabica                    | nd                    | -         |
| SG5                  | Nicaragua            | Arabica                    | nd                    | -         |
| SG6                  | Colombia             | Arabica                    | nd                    | -         |
| SG7                  | Papua New Guinea     | Arabica                    | nd                    | -         |
| SG8                  | Indonesia            | Arabica                    | nd                    | -         |
| SG9                  | Indonesia            | Robusta                    | 1615.86               | 134.03    |
| SG10                 | Indonesia            | Arabica                    | nd                    | -         |
| SG11                 | Brazil               | Arabica                    | nd                    | -         |
| SG12                 | Ethiopia             | Arabica                    | nd                    | -         |
| SG13                 | Brazil               | Arabica                    | nd                    | -         |
| SG14                 | Nicaragua            | Arabica                    | nd                    | -         |
| SG15                 | Tanzania             | Arabica                    | nd                    | -         |
| SG16                 | Ethiopia             | Arabica                    | nd                    | -         |
| SG17                 | Papua New Guinea     | Arabica                    | nd                    | -         |
| SG18                 | Indonesia            | Robusta                    | 1005.55               | 43.74     |
| SG19                 | Guatemala            | Arabica                    | nd                    | -         |
| SG20                 | Colombia             | Arabica                    | nd                    | -         |
| SG21                 | Costa Rican          | Arabica                    | nd                    | -         |
| SG22                 | Brazil               | Arabica                    | nd                    | -         |
| SG23                 | Indonesia            | Arabica                    | nd                    | -         |
| SG24                 | Nicaragua            | Arabica                    | nd                    | -         |
| SG25                 | Guatemala            | Arabica                    | nd                    | -         |
| SG26                 | Ethiopia             | Arabica                    | nd                    | -         |
| SG27                 | Indonesia            | Arabica                    | nd                    | -         |
| SG28                 | Not specified        | Robusta                    | 1510.27               | 110.17    |
| SG29                 | Not specified        | Arabica                    | nd                    | -         |
| SG30                 | Not specified        | Arabica                    | nd                    | -         |
| SG31                 | Not specified        | Arabica                    | nd                    | -         |
| SG32                 | Not specified        | Arabica                    | nd                    | -         |

|      |               |                                 |         |        |
|------|---------------|---------------------------------|---------|--------|
| SG33 | Not specified | Arabica                         | nd      | -      |
| SG34 | Not specified | Arabica                         | nd      | -      |
| SG35 | Not specified | Arabica                         | nd      | -      |
| SG36 | Ethiopia      | Arabica                         | nd      | -      |
| SG37 | Not specified | Arabica                         | nd      | -      |
| SG38 | Brazil        | Arabica                         | nd      | -      |
| SG39 | Not specified | Arabica                         | nd      | -      |
| SG40 | Guatemala     | Arabica                         | nd      | -      |
| SG41 | Not specified | Arabica                         | nd      | -      |
| SG42 | Brazil        | Cannot<br>identify <sup>b</sup> | nd      | -      |
| SG43 | Ethiopia      | Arabica                         | nd      | -      |
| SG44 | Not specified | Arabica                         | nd      | -      |
| SG45 | Not specified | Cannot<br>identify <sup>b</sup> | nd      | -      |
| SG46 | Not specified | Cannot<br>identify <sup>b</sup> | nd      | -      |
| SG47 | Indonesia     | Robusta                         | 1569.76 | 100.21 |

<sup>a</sup>Coffee variety was confirmed using DNA identification.

<sup>b</sup>Sample SG42, SG45, and SG 46: cannot identify the species because they are decaf coffee beans.

<sup>c</sup>nd – not detectable.

8 **Table S2.** Information and 16-OMC content of single roast coffee samples.

| Sample number | Coffee origin | Labeled species | 16-OMC (mg/kg)  | SD    |
|---------------|---------------|-----------------|-----------------|-------|
| SR1           | Ethiopia      | Arabica         | nd <sup>a</sup> | -     |
| SR2           | Indonesia     | Arabica         | nd              | -     |
| SR3           | Indonesia     | Arabica         | nd              | -     |
| SR4           | Colombia      | Arabica         | nd              | -     |
| SR5           | Indonesia     | Robusta         | 3208.32         | 14.90 |

9 <sup>a</sup>nd – not detectable.

10 **Table S3.** Information and 16-OMC content of ground coffee products.

| Sample number | Country of production | Labeled species | 16-OMC mg/kg    | SD |
|---------------|-----------------------|-----------------|-----------------|----|
| SP1           | Sweden                | 100% arabica    | nd <sup>a</sup> | -  |
| SP2           | Germany               | 100% arabica    | nd              | -  |
| SP3           | Italia                | 100% arabica    | nd              | -  |
| SP4           | Germany               | 100% arabica    | nd              | -  |
| SP5           | Taiwan                | 100% arabica    | nd              | -  |
| SP6           | Italia                | 100% arabica    | nd              | -  |
| SP7           | Netherlands           | 100% arabica    | nd              | -  |
| SP8           | Sweden                | 100% arabica    | nd              | -  |
| SP9           | Italia                | 100% arabica    | nd              | -  |
| SP10          | Taiwan                | 100% arabica    | nd              | -  |

11 <sup>a</sup>nd – not detectable.

12

13 **Table S4.** Information and 16-OMC content of instant coffee products.

| <b>Sample number</b> | <b>Country of production</b> | <b>Labeled species</b> | <b>16-OMC mg/kg</b> | <b>SD</b> |
|----------------------|------------------------------|------------------------|---------------------|-----------|
| SI1                  | Japan                        | -                      | nd <sup>a</sup>     | -         |
| SI2                  | Poland                       | 100% arabica           | nd                  | -         |
| SI3                  | Brazil                       | Arabica                | nd                  | -         |
| SI4                  | Japan                        | Arabica                | nd                  | -         |

14 <sup>a</sup>nd – not detectable.
